# Supplementary material
Source: MDPI journal article supplement (https://www.mdpi.com/2072-4292/14/17/4267)
Supplement: s1 [file s1]

| Indice        | aSM <sub>inTg</sub> | MSE_M <sub>inTgi</sub> | E <sub>inTg</sub> |
|---------------|---------------------|------------------------|-------------------|
| NDVI_median   | 0.286434            | 0.132019637            | 0.248619          |
| EXG_median    | 0.282297            | 0.142348278            | 0.242112          |
| OSAVI         | 0.27879             | 0.141246596            | 0.239412          |
| DSWI-4        | 0.274647            | 0.130577611            | 0.238784          |
| RDVI          | 0.274793            | 0.137548947            | 0.236995          |
| RDVI2         | 0.274793            | 0.137548947            | 0.236995          |
| GLI           | 0.276716            | 0.145626202            | 0.236419          |
| MCARI2        | 0.265115            | 0.123383754            | 0.232404          |
| MTVI2         | 0.265115            | 0.123383754            | 0.232404          |
| EVI           | 0.265273            | 0.126345763            | 0.231757          |
| SAVI3         | 0.264506            | 0.126248112            | 0.231112          |
| SARVI2        | 0.261139            | 0.121191903            | 0.229491          |
| EVI2(2)       | 0.260358            | 0.123036912            | 0.228325          |
| SBL           | 0.261595            | 0.130566959            | 0.22744           |
| MTVI1         | 0.25833             | 0.119903928            | 0.227355          |
| MSAVI         | 0.257373            | 0.121275603            | 0.22616           |
| SAVI          | 0.254969            | 0.119481325            | 0.224505          |
| EVI2          | 0.254969            | 0.119481325            | 0.224505          |
| TCI           | 0.25411             | 0.120916054            | 0.223384          |
| PVR           | 0.257364            | 0.132633142            | 0.223229          |
| NGRDI         | 0.257364            | 0.132633142            | 0.223229          |
| RI            | 0.257364            | 0.132633142            | 0.223229          |
| NLI_median    | 0.262322            | 0.150605885            | 0.222815          |
| NLI           | 0.262322            | 0.150605885            | 0.222815          |
| VI700         | 0.254857            | 0.130881776            | 0.221501          |
| MCARI         | 0.250666            | 0.117449627            | 0.221226          |
| SR700/670     | 0.253623            | 0.129235677            | 0.220846          |
| Fe3+          | 0.25345             | 0.131381893            | 0.220151          |
| SR672/550     | 0.25345             | 0.131381893            | 0.220151          |
| GVI           | 0.248155            | 0.120346088            | 0.21829           |
| RSR           | 0.246174            | 0.119487556            | 0.216759          |
| Norm R        | 0.25618             | 0.154111694            | 0.2167            |
| GEMI          | 0.245483            | 0.118627742            | 0.216362          |
| PPR           | 0.244455            | 0.116293582            | 0.216027          |
| IPVI          | 0.255444            | 0.156504356            | 0.215466          |
| LOGR          | 0.253437            | 0.150564957            | 0.215279          |
| WDRVI         | 0.253763            | 0.151988014            | 0.215194          |
| GOSAVI        | 0.246659            | 0.12843584             | 0.214979          |
| ARVI_median   | 0.2542              | 0.155225418            | 0.214742          |
| ARVI          | 0.2542              | 0.155225418            | 0.214742          |
| mCRIG         | 0.241885            | 0.112552265            | 0.21466           |
| SAVI_median   | 0.254071            | 0.155497923            | 0.214563          |
| ARVI2         | 0.25395             | 0.155461608            | 0.21447           |
| PSNDb1        | 0.25395             | 0.155461608            | 0.21447           |
| ATSAVI_median | 0.253387            | 0.155062146            | 0.214096          |
| RBNDVI        | 0.253047            | 0.154616015            | 0.213922          |
| CTVI          | 0.252453            | 0.154346108            | 0.213488          |
| TNDVI         | 0.252453            | 0.154346108            | 0.213488          |
| PSNDc2        | 0.247258            | 0.139398374            | 0.212791          |

|                  |          |             |          |
|------------------|----------|-------------|----------|
| BNDVI            | 0.247258 | 0.139398374 | 0.212791 |
| BWDRVI           | 0.247258 | 0.139398374 | 0.212791 |
| BGI              | 0.239594 | 0.111991827 | 0.212761 |
| MSR670           | 0.248176 | 0.145266289 | 0.212125 |
| MSRNir/RED       | 0.248176 | 0.145266289 | 0.212125 |
| Diff800/680      | 0.238167 | 0.109808201 | 0.212014 |
| Sred/NIR         | 0.248868 | 0.151627235 | 0.211133 |
| GSAVI            | 0.232948 | 0.111257557 | 0.207031 |
| PSSRc1           | 0.238053 | 0.131078245 | 0.206849 |
| ND774/677        | 0.243914 | 0.15342132  | 0.206492 |
| Rededge2         | 0.243914 | 0.15342132  | 0.206492 |
| SR440/740        | 0.235473 | 0.124321476 | 0.206199 |
| RVI_median       | 0.2369   | 0.137267456 | 0.204381 |
| RVI              | 0.2369   | 0.137267456 | 0.204381 |
| DVI              | 0.2369   | 0.137267456 | 0.204381 |
| ELAI_median      | 0.2369   | 0.137267456 | 0.204381 |
| Norm NIR         | 0.242322 | 0.160289116 | 0.20348  |
| GRNDVI           | 0.242322 | 0.160289116 | 0.20348  |
| LWCI             | 0.225477 | 0.11238984  | 0.200136 |
| Gossan           | 0.224675 | 0.109829237 | 0.199999 |
| SRMIR/Red        | 0.224675 | 0.109829237 | 0.199999 |
| VARlgreen        | 0.2259   | 0.117319213 | 0.199397 |
| LCI              | 0.237654 | 0.161216395 | 0.199341 |
| GBNDVI           | 0.2344   | 0.153584887 | 0.1984   |
| Rededge1         | 0.230117 | 0.138851334 | 0.198165 |
| NDVlc            | 0.228882 | 0.143024947 | 0.196147 |
| SLAVI            | 0.225138 | 0.144829803 | 0.192532 |
| DI1_median       | 0.210172 | 0.096982494 | 0.189789 |
| Diff800/550      | 0.210172 | 0.096982494 | 0.189789 |
| GDVI             | 0.210172 | 0.096982494 | 0.189789 |
| FE2+             | 0.209206 | 0.113058364 | 0.185554 |
| Ferrous iron     | 0.209206 | 0.113058364 | 0.185554 |
| NRI_median       | 0.21888  | 0.163312332 | 0.183134 |
| GNDVI            | 0.21888  | 0.163312332 | 0.183134 |
| GNDVhyper2       | 0.21888  | 0.163312332 | 0.183134 |
| GNDVI2           | 0.21888  | 0.163312332 | 0.183134 |
| SR550/800        | 0.216829 | 0.16114653  | 0.181888 |
| Datt22           | 0.209332 | 0.140038639 | 0.180017 |
| SRNir/700        | 0.209332 | 0.140038639 | 0.180017 |
| Cirededge (b5)   | 0.209332 | 0.140038639 | 0.180017 |
| sr735/700        | 0.211083 | 0.147407622 | 0.179968 |
| DVIMSS           | 0.196824 | 0.09184684  | 0.178746 |
| MGVI             | 0.196326 | 0.089655088 | 0.178725 |
| NDSI             | 0.206476 | 0.13552858  | 0.178493 |
| NSIMSS           | 0.196077 | 0.09176704  | 0.178084 |
| ND800/2170       | 0.205733 | 0.136307544 | 0.17769  |
| MNDVI2           | 0.205733 | 0.136307544 | 0.17769  |
| Ferros Silicates | 0.204154 | 0.131461075 | 0.177316 |
| SR800/550        | 0.207635 | 0.150979417 | 0.176286 |
| GRVI             | 0.207635 | 0.150979417 | 0.176286 |

|                      |          |             |          |
|----------------------|----------|-------------|----------|
| GCI_median           | 0.207635 | 0.150979417 | 0.176286 |
| Cigreen              | 0.207635 | 0.150979417 | 0.176286 |
| Alteration           | 0.204182 | 0.137217407 | 0.176165 |
| Laterite             | 0.204182 | 0.137217407 | 0.176165 |
| TM5                  | 0.204182 | 0.137217407 | 0.176165 |
| AVI*                 | 0.192216 | 0.089722697 | 0.17497  |
| SRSWIRI/NIR          | 0.198854 | 0.122604492 | 0.174474 |
| n dla GEMI           | 0.189243 | 0.087742845 | 0.172638 |
| Norm G               | 0.205716 | 0.16263262  | 0.17226  |
| GNDVhyper            | 0.202619 | 0.154657095 | 0.171283 |
| CRI550               | 0.1885   | 0.092831517 | 0.171001 |
| Chlgreen             | 0.199671 | 0.149756178 | 0.169769 |
| FerricOxides         | 0.192309 | 0.124193138 | 0.168425 |
| MSI2                 | 0.192309 | 0.124193138 | 0.168425 |
| RDI                  | 0.192309 | 0.124193138 | 0.168425 |
| NDSI_median          | 0.192685 | 0.128226199 | 0.167978 |
| NDII                 | 0.192685 | 0.128226199 | 0.167978 |
| SoilCompositionIndex | 0.192685 | 0.128226199 | 0.167978 |
| PNDVI                | 0.199257 | 0.166916392 | 0.165998 |
| TCARI                | 0.180676 | 0.085595448 | 0.165211 |
| SR6_median           | 0.178099 | 0.084878811 | 0.162982 |
| Datt2                | 0.178099 | 0.084878811 | 0.162982 |
| mNDVI                | 0.178027 | 0.09505024  | 0.161105 |
| SB735                | 0.173435 | 0.083099103 | 0.159023 |
| mND680               | 0.17313  | 0.083629105 | 0.158651 |
| MSAVI_median         | 0.173128 | 0.083626946 | 0.15865  |
| AFRI1600             | 0.173104 | 0.083618464 | 0.158629 |
| AFRI2100             | 0.173102 | 0.083617361 | 0.158627 |
| SB800                | 0.173087 | 0.083611108 | 0.158615 |
| MVI                  | 0.180447 | 0.122632476 | 0.158318 |
| SR833/1649           | 0.180447 | 0.122632476 | 0.158318 |
| NRNIR/MIR            | 0.180447 | 0.122632476 | 0.158318 |
| SIPI_median          | 0.169468 | 0.101822227 | 0.152212 |
| SIPI1                | 0.169468 | 0.101822227 | 0.152212 |
| MCARI/OSAVi          | 0.163664 | 0.084825742 | 0.149781 |
| H                    | 0.16918  | 0.116637857 | 0.149447 |
| GARI                 | 0.164167 | 0.102561654 | 0.14733  |
| ARI2_median          | 0.16564  | 0.114748659 | 0.146633 |
| mARI                 | 0.16564  | 0.114748659 | 0.146633 |
| MYVI                 | 0.160127 | 0.085061469 | 0.146507 |
| GVIMSS               | 0.156676 | 0.077405584 | 0.144549 |
| ARI                  | 0.157968 | 0.104387539 | 0.141478 |
| Maccioni             | 0.161306 | 0.145215962 | 0.137882 |
| Datt1                | 0.151245 | 0.130553215 | 0.1315   |
| MNSI                 | 0.141309 | 0.07549837  | 0.130641 |
| EVI_median(6,7.5)    | 0.14223  | 0.09061946  | 0.129341 |
| CRI700               | 0.135671 | 0.084303668 | 0.124233 |
| GVMi                 | 0.135922 | 0.097941238 | 0.122609 |
| Rre                  | 0.12935  | 0.070098398 | 0.120283 |
| IO                   | 0.131344 | 0.092342615 | 0.119216 |

|                |          |             |          |
|----------------|----------|-------------|----------|
| RGR            | 0.131344 | 0.092342615 | 0.119216 |
| WET            | 0.128965 | 0.088089858 | 0.117604 |
| CI             | 0.125405 | 0.082748556 | 0.115028 |
| STVI_median    | 0.122342 | 0.071715145 | 0.113568 |
| BRI            | 0.119956 | 0.059732107 | 0.112791 |
| CCCI           | 0.122191 | 0.108092966 | 0.108983 |
| Diff678/500    | 0.113754 | 0.07654839  | 0.105046 |
| CVI            | 0.122752 | 0.144357464 | 0.105032 |
| MCARI?MTVI2    | 0.113747 | 0.081268706 | 0.104503 |
| TCARI/OSAVI    | 0.111657 | 0.08735168  | 0.101903 |
| CARI           | 0.108268 | 0.070352073 | 0.100652 |
| REIP1          | 0.11305  | 0.122185153 | 0.099237 |
| mCRIRE         | 0.105249 | 0.073031581 | 0.097563 |
| Datt6          | 0.105909 | 0.118407809 | 0.093369 |
| MNDI_median    | 0.099712 | 0.064416635 | 0.093289 |
| SBIMSS         | 0.099648 | 0.0666648   | 0.093005 |
| MSBI           | 0.098942 | 0.067654445 | 0.092248 |
| SBI            | 0.097755 | 0.065423254 | 0.091359 |
| SB650          | 0.095362 | 0.074511693 | 0.088257 |
| SB550          | 0.088823 | 0.077081136 | 0.081976 |
| SB700          | 0.087558 | 0.070962146 | 0.081344 |
| SB460          | 0.078717 | 0.068568253 | 0.07332  |
| IR550          | 0.076308 | 0.079797156 | 0.070219 |
| ARI_median     | 0.075766 | 0.076642162 | 0.069959 |
| CARI2          | 0.074134 | 0.056811377 | 0.069923 |
| YVIMSS         | 0.071782 | 0.065254157 | 0.067098 |
| yellow_median  | 0.067254 | 0.072754752 | 0.062361 |
| IR700          | 0.066079 | 0.060085861 | 0.062108 |
| SR700          | 0.066079 | 0.060085861 | 0.062108 |
| I              | 0.066728 | 0.071875506 | 0.061932 |
| MSAVIhyper     | 0.065967 | 0.062829924 | 0.061822 |
| SB1580         | 0.065754 | 0.060434936 | 0.06178  |
| SB2100         | 0.065877 | 0.062805219 | 0.061739 |
| Cirededge (b6) | 0.064538 | 0.05041218  | 0.061284 |
| RRI1           | 0.064538 | 0.05041218  | 0.061284 |
| Cirededge (b7) | 0.056465 | 0.036250332 | 0.054419 |
| NDRE           | 0.056188 | 0.038517001 | 0.054023 |
