# Supplementary material
Source: MDPI journal article supplement (https://www.mdpi.com/2072-4292/14/17/4267)
Supplement: s1 [file s1]

| indice            | link                                                   |
|-------------------|--------------------------------------------------------|
| ATSAVI            | Adjusted transformed soil-adjusted VI                  |
| AFRI1600          | Aerosol free vegetation index 1600                     |
| AFRI2100          | Aerosol free vegetation index 2100                     |
| Alteration        | Alteration                                             |
| ARI               | Anthocyanin reflectance index                          |
| AVI               | Ashburn Vegetation Index                               |
| ARVI              | Atmospherically Resistant Vegetation Index             |
| ARVI2             | Atmospherically Resistant Vegetation Index 2           |
| BWDRVI            | Blue-wide dynamic range vegetation index               |
| BRI               | Browning Reflectance Index                             |
| CCCI              | Canopy Chlorophyll Content Index                       |
| CARI              | Chlorophyll Absorption Ratio Index                     |
| CARI2             | Chlorophyll Absorption Ratio Index 2                   |
| Chlgreen          | Chlorophyll Green                                      |
| Clgreen           | Chlorophyll Index Green                                |
| Clrededge         | Chlorophyll IndexRedEdge                               |
| Chlred-edge       | Chlorophyll Red-Edge                                   |
| CVI               | Chlorophyll vegetation index                           |
| CI                | Coloration Index                                       |
| CTVI              | Corrected Transformed Vegetation Index                 |
| CRI550            | CRI550                                                 |
| CRI700            | CRI700                                                 |
| Datt1             | Datt1                                                  |
| Datt4             | Datt4                                                  |
| Datt6             | Datt6                                                  |
| D678/500          | Difference 678/500                                     |
| D800/550          | Difference 800/550                                     |
| D800/680          | Difference 800/680                                     |
| D833/658          | Difference 833/658                                     |
| GDVI              | Difference NIR/Green Green Difference Vegetation Index |
| DVIMSS            | Differenced Vegetation Index MSS                       |
| EVI               | Enhanced Vegetation Index                              |
| EVI2              | Enhanced Vegetation Index 2                            |
| EVI2              | Enhanced Vegetation Index 2 -2                         |
| EPI               | EPI                                                    |
| Fe2+              | Ferric iron, Fe2+                                      |
| Fe3+              | Ferric iron, Fe3+                                      |
| Ferric Oxides     | Ferric Oxides                                          |
| Ferrous iron      | Ferrous iron                                           |
| Ferrous Silicates | Ferrous Silicates                                      |
| GEMI              | Global Environment Monitoring Index                    |

|             |                                                        |
|-------------|--------------------------------------------------------|
| GVMi        | Global Vegetation Moisture Index                       |
| Gossan      | Gossan                                                 |
| GARI        | Green atmospherically resistant vegetation index       |
| GLI         | Green leaf index                                       |
| GNDVI       | Green Normalized Difference Vegetation Index           |
| GOSAVI      | Green Optimized Soil Adjusted Vegetation Index         |
| GSaVI       | Green Soil Adjusted Vegetation Index                   |
| GBNDVI      | Green-Blue NDVI                                        |
| GRNDVI      | Green-Red NDVI                                         |
| H           | Hue                                                    |
| IVI         | Ideal vegetation index                                 |
| IPVI        | Infrared percentage vegetation index                   |
| I           | Intensity                                              |
| IR550       | Inverse reflectance 550                                |
| IR700       | Inverse reflectance 700                                |
| Laterite    | Laterite                                               |
| LCI         | Leaf Chlorophyll Index                                 |
| LWCI        | Leaf Water Content Index                               |
| LogR        | Log Ratio                                              |
| Maccioni    | Maccioni                                               |
| MCARI/MTVI2 | MCARI/MTVI2                                            |
| MCARI/OSaVI | MCARI/OSaVI                                            |
| mCRIG       | mCRIG                                                  |
| mCRIRE      | mCRIRE                                                 |
| MVI         | Mid-infrared vegetation index                          |
| MGVI        | Misra Green Vegetation Index                           |
| MNSI        | Misra Non Such Index                                   |
| MSBI        | Misra Soil Brightness Index                            |
| MYVI        | Misra Yellow Vegetation Index                          |
| mND680      | mND680                                                 |
| mARI        | Modified anthocyanin reflectance index                 |
| MCARI       | Modified Chlorophyll Absorption in Reflectance Index   |
| MCARI1      | Modified Chlorophyll Absorption in Reflectance Index 1 |
| MCARI2      | Modified Chlorophyll Absorption in Reflectance Index 2 |
| mNDVI       | Modified NDVI                                          |
| mSR         | Modified Simple Ratio                                  |
| MSR670      | Modified Simple Ratio 670,800                          |
| MSRNir/Red  | Modified Simple Ratio NIR/RED                          |
| MSaVI       | Modified Soil Adjusted Vegetation Index                |
| MSaVIhyper  | Modified Soil Adjusted Vegetation Index hyper          |
| MTVI1       | Modified Triangular Vegetation Index 1                 |
| MTVI2       | Modified Triangular Vegetation Index 2                 |

|             |                                                                                                                                  |
|-------------|----------------------------------------------------------------------------------------------------------------------------------|
| NLI         | Nonlinear vegetation index                                                                                                       |
| Norm G      | Norm G                                                                                                                           |
| Norm NIR    | Norm NIR                                                                                                                         |
| Norm R      | Norm R                                                                                                                           |
| PPR         | Normalized Difference 550/450 Plant pigment ratio                                                                                |
| PVR         | Normalized Difference 550/650 Photosynthetic vigour ratio                                                                        |
| ND774/677   | Normalized Difference 774/677                                                                                                    |
| GNDVIhyper  | Normalized Difference 780/550 Green NDVI hyper                                                                                   |
| ND782/666   | Normalized Difference 782/666                                                                                                    |
| ND790/670   | Normalized Difference 790/670                                                                                                    |
| ND800/2170  | Normalized Difference 800/2170                                                                                                   |
| PSNDC2      | Normalized Difference 800/470 Pigment specific normalised difference C2                                                          |
| PSNDC1      | Normalized Difference 800/500 Pigment specific normalised difference C1                                                          |
| GNDVIhyper2 | Normalized Difference 800/550 Green NDVI hyper 2                                                                                 |
| PSNDB1      | Normalized Difference 800/650 Pigment specific normalised difference B1                                                          |
| PSNDA1      | Normalized Difference 800/675 Pigment specific normalised difference A1                                                          |
| ND800/680   | Normalized Difference 800/680 Pigment specific normalised difference A2, Lichtenthaler indices 1, NDVIhyper                      |
| NDII        | Normalized Difference 819/1600 NDII                                                                                              |
| NDII2       | Normalized Difference 819/1649 NDII 2                                                                                            |
| NDMI        | Normalized Difference 820/1600 Normalized Difference Moisture Index                                                              |
| ND827/668   | Normalized Difference 827/668                                                                                                    |
| ND833/1649  | Normalized Difference 833/1649 Infrared Index                                                                                    |
| ND833/658   | Normalized Difference 833/658                                                                                                    |
| SIWSI       | Normalized Difference 860/1640                                                                                                   |
| ND895/675   | Normalized Difference 895/675                                                                                                    |
| NGRDI       | Normalized Difference Green/Red Normalized green red difference index, Visible Atmospherically Resistant Indices Green (Vlgreen) |
| NDVI        | Normalized Difference MIR/NIR Normalized Difference Vegetation Index (in case of strong atmospheric disturbances)                |
| BNDVI       | Normalized Difference NIR/Blue Blue-normalized difference vegetation index                                                       |
| GNDVI       | Normalized Difference NIR/Green Green NDVI                                                                                       |
| MNDVI       | Normalized Difference NIR/MIR Modified Normalized Difference Vegetation Index                                                    |
| NDVI        | Normalized Difference NIR/Red Normalized Difference Vegetation Index, Calibrated NDVI - CDVI                                     |
| NDRE        | Normalized Difference NIR/Rededge Normalized Difference Red-Edge                                                                 |
| NBR         | Normalized Difference NIR/SWIR Normalized Burn Ratio                                                                             |
| RI          | Normalized Difference Red/Green Redness Index                                                                                    |
| NDSI        | Normalized Difference Salinity Index                                                                                             |
| NDVI690-710 | Normalized Difference Vegetation Index 690-710                                                                                   |
| NDVIC       | Normalized Difference Vegetation Index C                                                                                         |
| OSAVI       | Optimized Soil Adjusted Vegetation Index                                                                                         |
| PNDVI       | Pan NDVI                                                                                                                         |
| PVI         | Perpendicular Vegetation Index                                                                                                   |
| RARSa1      | Ratio Analysis of Reflectance Spectra A1                                                                                         |
| RARSa2      | Ratio Analysis of Reflectance Spectra A2                                                                                         |

|            |                                                       |
|------------|-------------------------------------------------------|
| RARSa3     | Ratio Analysis of Reflectance Spectra A3              |
| RARSa4     | Ratio Analysis of Reflectance Spectra A4              |
| RARSc3     | Ratio Analysis of Reflectance Spectra C3              |
| RARSc4     | Ratio Analysis of Reflectance Spectra C4              |
| RDVI       | RDVI                                                  |
| RDVI2      | RDVI2                                                 |
| Rededge1   | Red edge 1                                            |
| Rededge2   | Red edge 2                                            |
| RBNDVI     | Red-Blue NDVI                                         |
| REIP1      | Red-Edge Inflection Point 1                           |
| REIP2      | Red-Edge Inflection Point 2                           |
| REIP3      | Red-Edge Inflection Point 3                           |
| REP        | Red-Edge Position Linear Interpolation                |
| RSR        | Reduced Simple Ratio                                  |
| Rre        | Reflectance at the inflexion point                    |
| RDVI       | Renormalized Difference Vegetation Index              |
| SAVImir    | SAVImir                                               |
| IF         | Shape Index                                           |
| MSI2       | Simple Ratio 1599/819 Moisture Stress Index 2         |
| MSI        | Simple Ratio 1600/820 Moisture Stress Index           |
| TM5/TM7    | Simple Ratio 1650/2218                                |
| SR440/740  | Simple Ratio 440/740                                  |
| BGI        | Simple Ratio 450/550 Blue green pigment index         |
| SR520/670  | Simple Ratio 520/670                                  |
| SR550/670  | Simple Ratio 550/670                                  |
| DSWI-4     | Simple Ratio 550/680 Disease-Water Stress Index 4     |
| SR550/800  | Simple Ratio 550/800                                  |
| GI         | Simple Ratio 554/677 Greenness Index                  |
| SR560/658  | Simple Ratio 560/658 GRVlhyper                        |
| SR672/550  | Simple Ratio 672/550 Datt5                            |
| SR672/708  | Simple Ratio 672/708                                  |
| SR674/553  | Simple Ratio 674/553                                  |
| SR675/555  | Simple Ratio 675/555                                  |
| SR675/700  | Simple Ratio 675/700                                  |
| SR675/705  | Simple Ratio 675/705                                  |
| SR700      | Simple Ratio 700                                      |
| SR700/670  | Simple Ratio 700/670                                  |
| SR710/670  | Simple Ratio 710/670                                  |
| SR735/710  | Simple Ratio 735/710                                  |
| SR774/677  | Simple Ratio 774/677                                  |
| SR800/2170 | Simple Ratio 800/2170                                 |
| PSSRc2     | Simple Ratio 800/470 Pigment specific simple ratio C2 |

|               |                                                                                 |
|---------------|---------------------------------------------------------------------------------|
| PSSRc1        | Simple Ratio 800/500 Pigment specific simple ratio C1                           |
| SR800/550     | Simple Ratio 800/550                                                            |
| PSSRb1        | Simple Ratio 800/650 Pigment specific simple ratio B1                           |
| RVI           | Simple Ratio 800/670 Ratio Vegetation Index                                     |
| PSSRa1        | Simple Ratio 800/675 Pigment specific simple ratio A1                           |
| SR800/680     | Simple Ratio 800/680 Pigment Specific Simple Ratio (Cholophyll a) (PSSRa)       |
| SR801/550     | Simple Ratio 801/550 NIR/Green                                                  |
| SR801/670     | Simple Ratio 801/670 NIR/Red                                                    |
| PBI           | Simple Ratio 810/560 Plant biochemical index                                    |
| SR833/1649    | Simple Ratio 833/1649 MSIhyper                                                  |
| SR833/658     | Simple Ratio 833/658                                                            |
| Datt2         | Simple Ratio 850/710 Datt2                                                      |
| SR860/550     | Simple Ratio 860/550                                                            |
| SR860/708     | Simple Ratio 860/708                                                            |
| RDI           | Simple Ratio MIR/NIR Ratio Drought Index                                        |
| SRMIR/Red     | Simple Ratio MIR/Red Eisenhydroxid-Index                                        |
| SRNir/700-715 | Simple Ratio NIR/700-715                                                        |
| GRVI          | Simple Ratio NIR/G Green Ratio Vegetation Index                                 |
| SRNIR/MIR     | Simple Ratio NIR/MIR                                                            |
| DVI           | Simple Ratio NIR/RED Difference Vegetation Index, Vegetation Index Number (VIN) |
| RR11          | Simple Ratio NIR/Rededge RedEdge Ratio Index 1                                  |
| IO            | Simple Ratio Red/Blue Iron Oxide                                                |
| RGR           | Simple Ratio Red/Green Red-Green Ratio                                          |
| SRRed/NIR     | Simple Ratio Red/NIR Ratio Vegetation-Index                                     |
| SRSWIRI/NIR   | Simple Ratio SWIRI/NIR Ferrous Minerals                                         |
| SB1580        | Single Band 1580                                                                |
| SB2100        | Single Band 2100                                                                |
| SB2130        | Single Band 2130                                                                |
| SB2180        | Single Band 2180                                                                |
| SB2218        | Single Band 2218                                                                |
| SB2240        | Single Band 2240                                                                |
| SB2250        | Single Band 2250                                                                |
| SB2270        | Single Band 2270                                                                |
| SB2280        | Single Band 2280                                                                |
| SB460         | Single Band 460                                                                 |
| BB3           | Single Band 470 Blackburn3                                                      |
| SR495         | Single Band 495                                                                 |
| SB550         | Single Band 550                                                                 |
| SB555         | Single Band 555                                                                 |
| SB655         | Single Band 655                                                                 |
| SB660         | Single Band 660                                                                 |
| SB670         | Single Band 670                                                                 |

|             |                                                       |
|-------------|-------------------------------------------------------|
| SB675       | Single Band 675                                       |
| BB1         | Single Band 680 Blackburn1                            |
| SB700       | Single Band 700                                       |
| SB703       | Single Band 703 Boochs                                |
| SB705       | Single Band 705                                       |
| SB735       | Single Band 735                                       |
| SB801       | Single Band 801                                       |
| SB850       | Single Band 850                                       |
| SB885       | Single Band 885                                       |
| SAVI        | Soil Adjusted Vegetation Index                        |
| SARVI       | Soil and Atmospherically Resistant Vegetation Index   |
| SARVI2      | Soil and Atmospherically Resistant Vegetation Index 2 |
| SAVI3       | Soil and Atmospherically Resistant Vegetation Index 3 |
| SBL         | Soil Background Line                                  |
| SCI         | Soil Composition Index                                |
| SAVI2       | Soil-adjusted vegetation index 2                      |
| SLAVI       | Specific Leaf Area Vegetation Index                   |
| SQRT(IR/R)  | SQRT(IR/R)                                            |
| SIPI1       | Structure Intensive Pigment Index 1                   |
| SIPI3       | Structure Intensive Pigment Index 3                   |
| SBI         | Tasselled Cap - brightness                            |
| GVIMSS      | Tasselled Cap - Green Vegetation Index MSS            |
| NSIMSS      | Tasselled Cap - Non Such Index MSS                    |
| SBIMSS      | Tasselled Cap - Soil Brightness Index MSS             |
| GVI         | Tasselled Cap - vegetation                            |
| WET         | Tasselled Cap - wetness                               |
| YVIMSS      | Tasselled Cap - Yellow Vegetation Index MSS           |
| TCARI/OSAVI | TCARI/OSAVI                                           |
| TCARI       | Transformed Chlorophyll Absorbtion Ratio              |
| TNDVI       | Transformed NDVI                                      |
| TSAVI       | Transformed Soil Adjusted Vegetation Index            |
| TSAVI       | Transformed Soil Adjusted Vegetation Index 2          |
| TVI         | Transformed Vegetation Index                          |
| TCI         | Triangular chlorophyll index                          |
| VI700       | Vegetation Index 700                                  |
| VARIGreen   | Visible Atmospherically Resistant Index Green         |
| VAR1700     | Visible Atmospherically Resistant Indices 700         |
| VARirededge | Visible Atmospherically Resistant Indices RedEdge     |
| WDVI        | Weighted Difference Vegetation Index                  |
| WDRVI       | Wide Dynamic Range Vegetation Index                   |
